# Supplementary material for: Lithium, zinc and scandium complexes of phosphorylated salicylaldimines: synthesis, structure, thermochemical and photophysical properties, and application in OLEDs
Source: Royal Society of Chemistry journal article supplement (doi:10.1039/c3ra43885f), 2013-01-01
Supplement: c3ra43885f.pdf [file c3ra43885f.pdf]

**Lithium, zinc and scandium complexes of phosphorylated salicylaldimines:  
synthesis, structure, thermochemical and photophysical properties, and application in  
organic light-emitting diodes (OLEDs)**

Diana V. Aleksanyan,<sup>\*a</sup> Vladimir A. Kozlov,<sup>a</sup> Boris I. Petrov,<sup>b</sup> Tatyana V. Balashova,<sup>b</sup> Anatoly P. Pushkarev,<sup>b</sup> Artem O. Dmitrienko,<sup>a</sup> Georgy K. Fukin,<sup>b</sup> Anton V. Cherkasov,<sup>b</sup> Mikhail N. Bochkarev,<sup>b</sup> Nikolay M. Lazarev,<sup>b</sup> Yulia A. Bessonova,<sup>b</sup> Gleb A. Abakumov<sup>b</sup>

<sup>a</sup>*A. N. Nesmeyanov Institute of Organoelement Compounds, Russian Academy of Sciences, ul. Vavilova 28, Moscow, 119991 Russia*

Corresponding author: [aleksanyan.diana@ineos.ac.ru](mailto:aleksanyan.diana@ineos.ac.ru), +74951359356

<sup>b</sup>*G. A. Razuvaev Institute of Organometallic Chemistry, Russian Academy of Sciences, ul. Tropinina 49, Nizhny Novgorod, 603950 Russia*

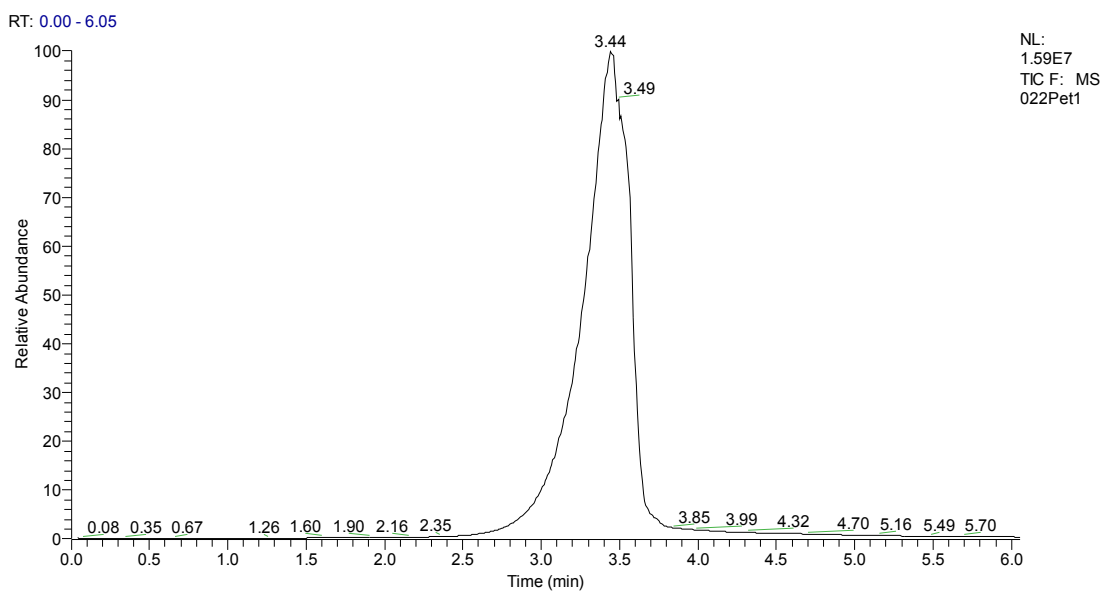

022Pet1 #357-396 RT: 3.23-3.55 AV: 40 NL: 3.49E6  
T: + c Full ms [ 70.00-500.00]

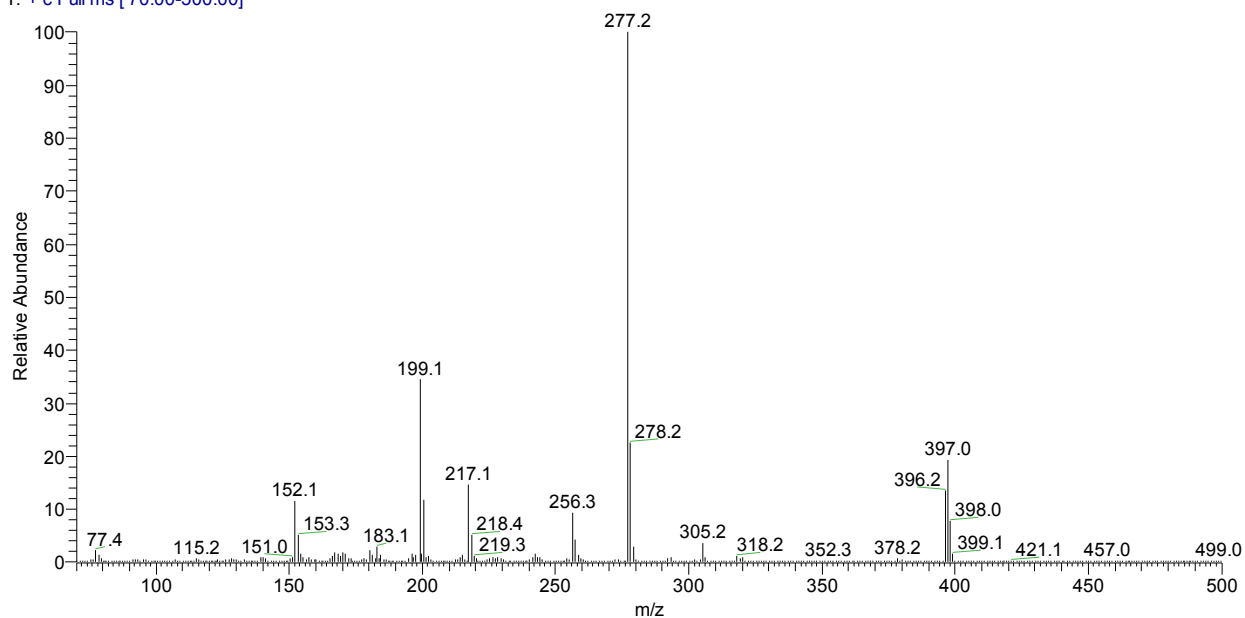

**Fig. 1S.** Gas-chromatography mass spectrum of ligand **1a**.

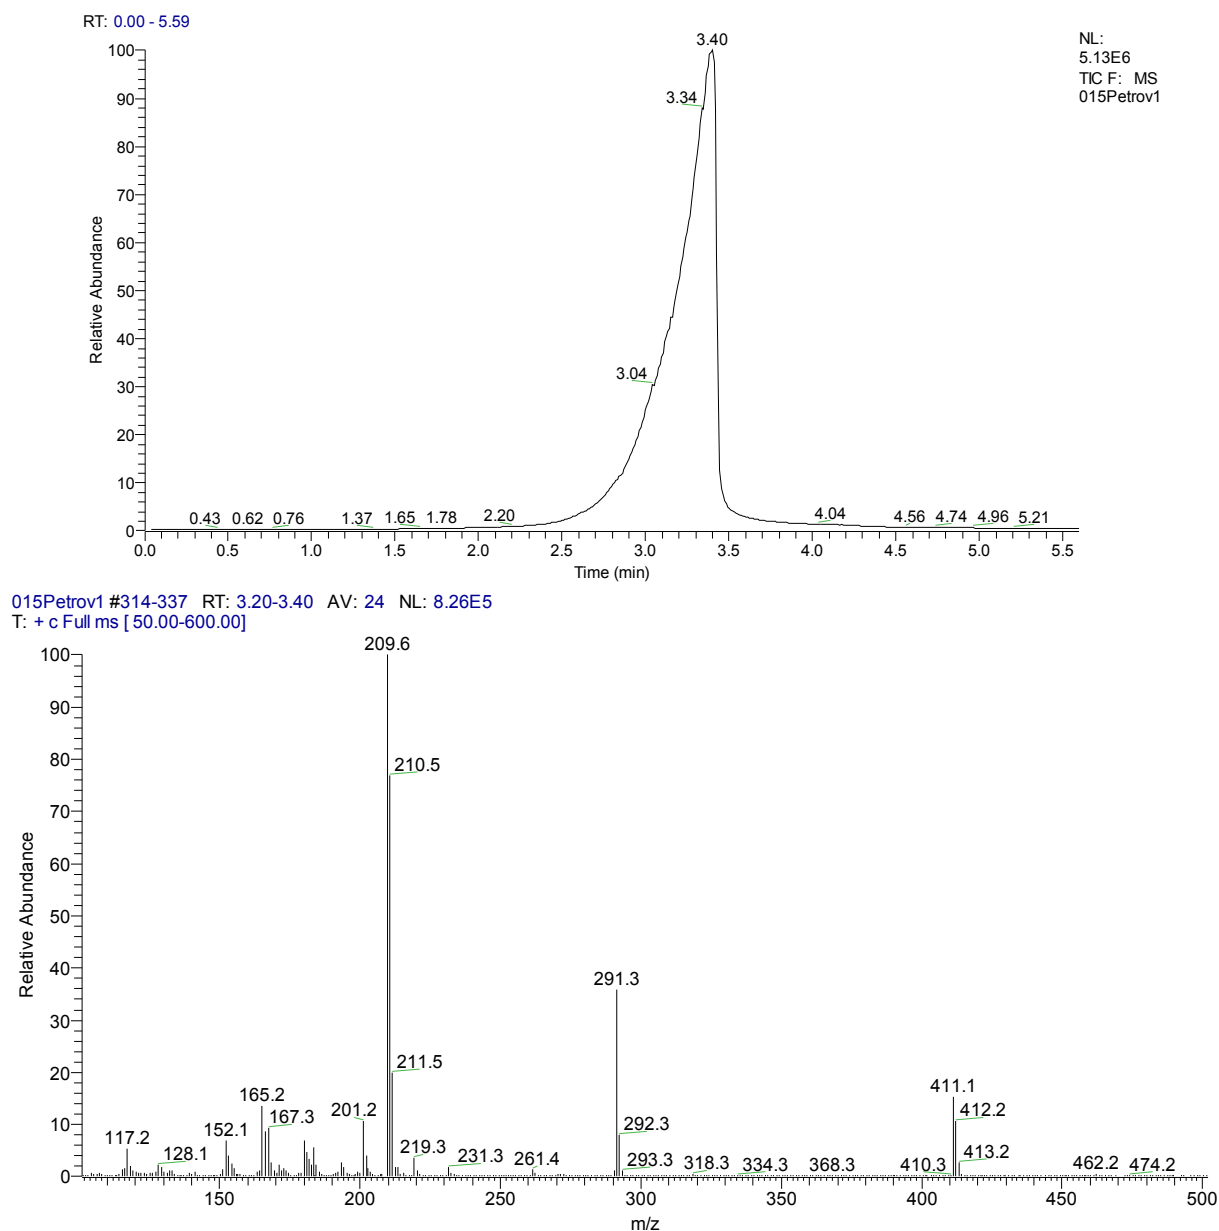

**Fig. 2S.** Gas-chromatography mass spectrum of ligand **1b**.

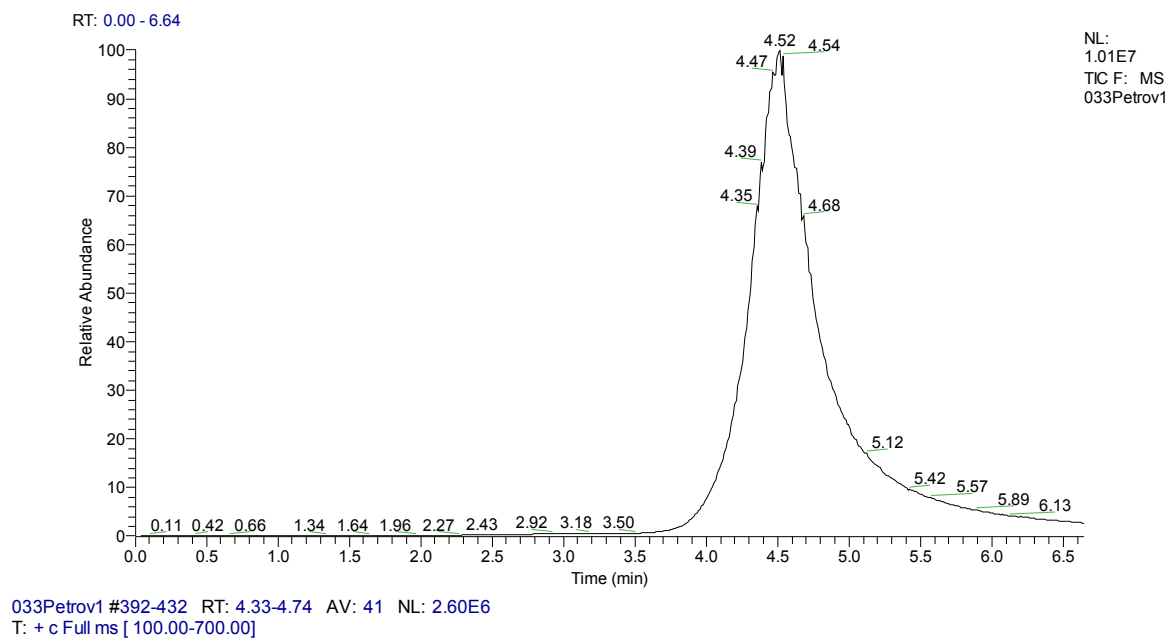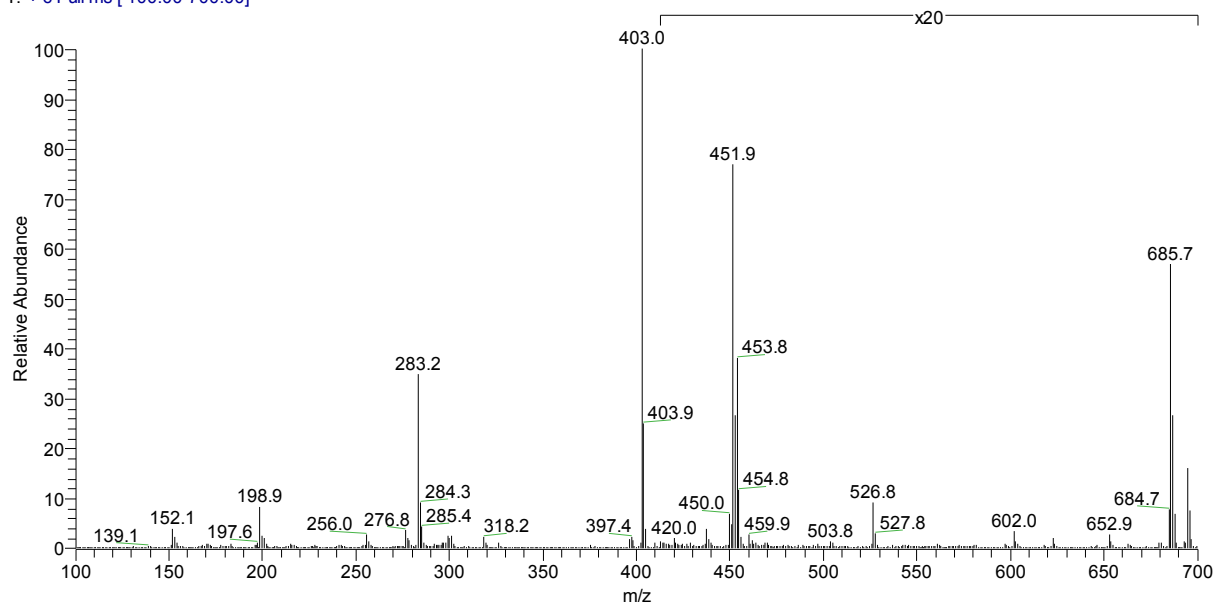

**Fig. 3S.** Gas-chromatography mass spectrum of complex **2a**.

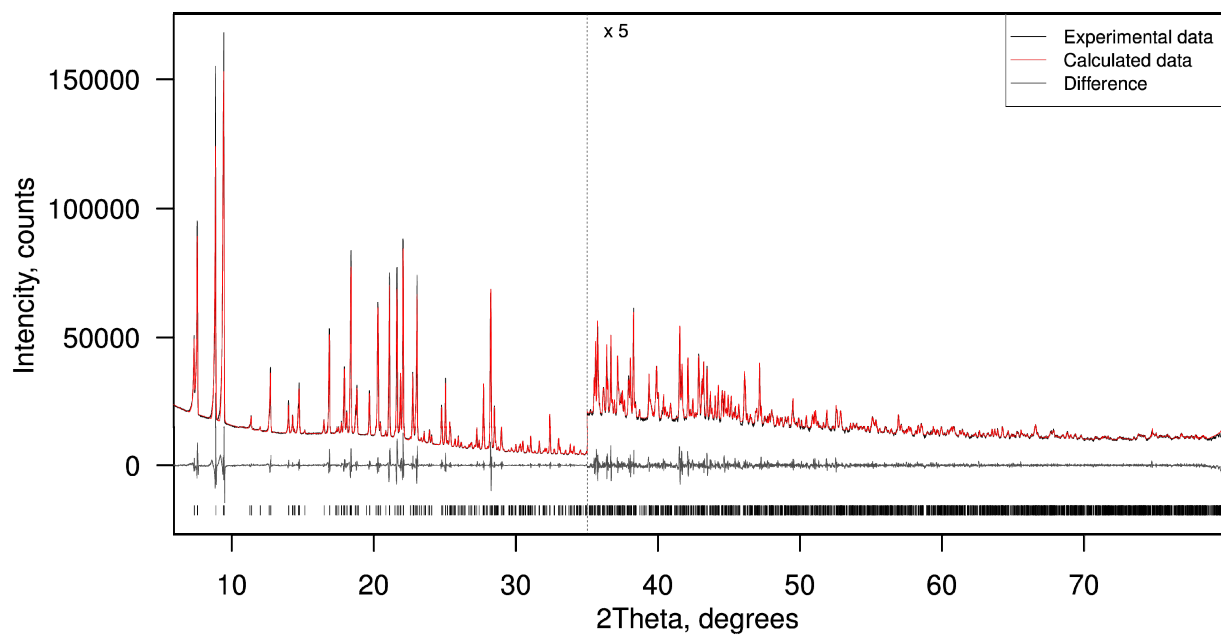

**Fig. 4S.** The experimental (black line), calculated (red line), and difference (grey line) powder XRD patterns of complex **4b**. Space group:  $C2/c$ ; cell parameters:  $a = 40.1059(9)$ ,  $b = 10.2569(2)$ ,  $c = 25.3030(4)$  Å,  $\beta = 35.799(1)^\circ$ .

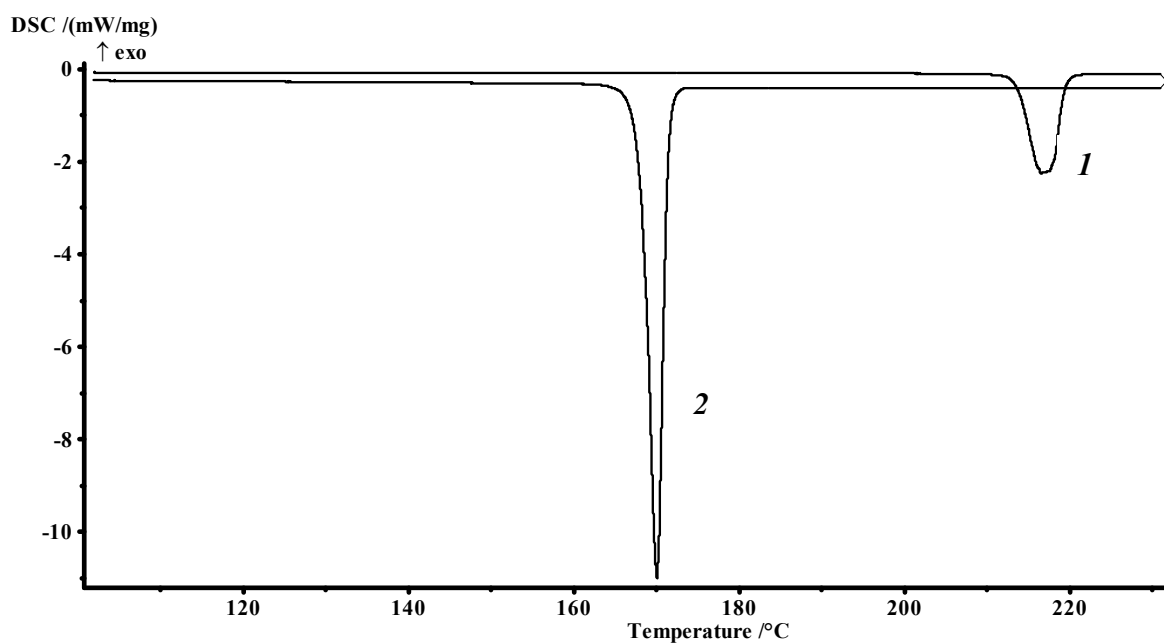

**Fig. 5S.** DSC traces of ligands **1a** (1) and **1b** (2).

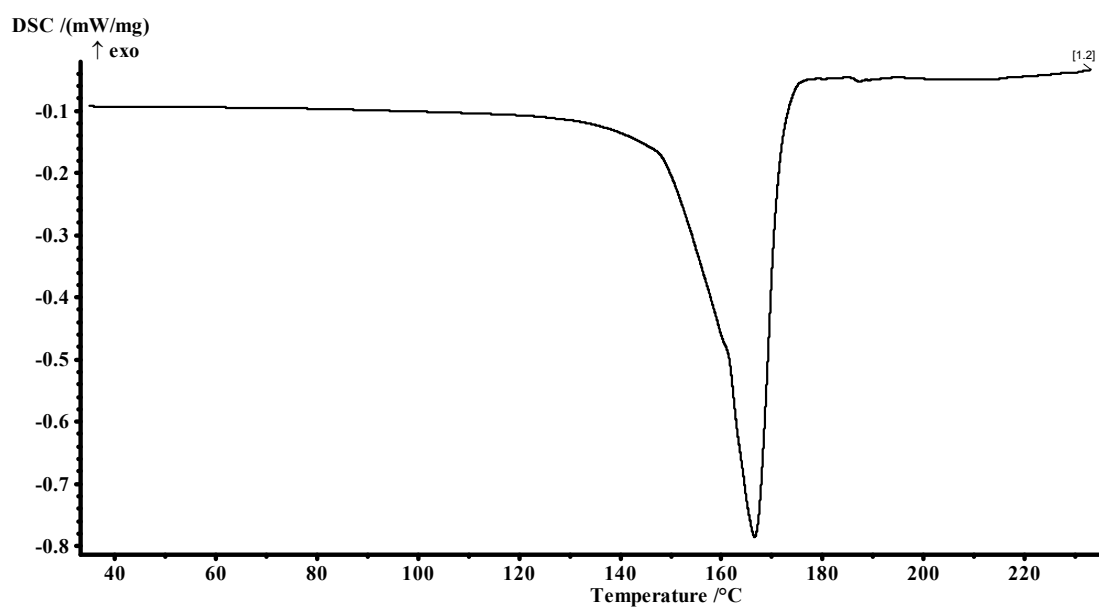

**Fig. 6S.** DSC trace of complex **4b**.
